# Supplementary material for: A randomized multicenter evaluation of the efficacy of 0.15% hyaluronic acid versus 0.05% cyclosporine A in dry eye syndrome
Source: PubMed Central journal article supplement (PMC9636392; doi:10.1038/s41598-022-21330-0), 2022-11-04
Supplement: 41598_2022_21330_MOESM1_ESM.pdf [file 41598_2022_21330_MOESM1_ESM.pdf]

## **A Multicenter, Randomized, Single-blind Evaluation of the Efficacy of 0.15% Hyaluronic Acid versus 0.05% Cyclosporine A in Moderate to Severe Dry Eye Syndrome**

Ji Eun Lee<sup>1,2†</sup>, Sangyoon Kim<sup>1,2†</sup>, Hyung Keun Lee<sup>3</sup>, Tae-Young Chung<sup>4</sup>, Jae Yong Kim<sup>5</sup>, Chul Young Choi<sup>6</sup>, So Hyang Chung<sup>7</sup>, Dong Hyun Kim<sup>8</sup>, Kyoung Woo Kim<sup>9</sup>, Jin Kwon Chung<sup>10</sup>, Gyu Yeon Hwang<sup>11</sup>, Ho Sik Hwang<sup>12</sup>, Jin Hyung Kim<sup>13</sup>, Joon Young Hyon<sup>14\*</sup>

<sup>1</sup>Department of Ophthalmology, Pusan National University Yangsan Hospital, Pusan National University School of Medicine, Yangsan, Korea

<sup>2</sup>Research Institute for Convergence of Biomedical Science and Technology, Pusan National University Yangsan Hospital, Pusan National University School of Medicine, Yangsan, Korea

<sup>3</sup>Institute of Vision Research, Department of Ophthalmology, Yonsei University College of Medicine, Seoul 06273, Korea.

<sup>4</sup>Department of Ophthalmology, Samsung Medical Center, Sungkyunkwan University School of Medicine, Seoul, Korea

<sup>5</sup>Department of Ophthalmology, Asan Medical Center, University of Ulsan College of Medicine, Seoul, Republic of Korea

<sup>6</sup>Department of Ophthalmology, Kangbuk Samsung Hospital, School of Medicine, Sungkyunkwan University, Seoul 03181, Korea

<sup>7</sup>Department of Ophthalmology, The Catholic University of Korea Seoul St. Mary's Hospital, Seoul, Korea

<sup>8</sup>Department of Ophthalmology, Gil Medical Center, Gachon University College of Medicine, Incheon, Korea.

<sup>9</sup>Department of Ophthalmology, Chung-Ang University Hospital, Chung-Ang University College of Medicine, Seoul, Korea

<sup>10</sup>Department of Ophthalmology, Soonchunhyang University College of Medicine, Soonchunhyang University Seoul Hospital, Seoul 140-743, Republic of Korea

<sup>11</sup>Department of Ophthalmology, KIM's Eye Hospital, Seoul, Korea

<sup>12</sup>Department of Ophthalmology, Yeouido St. Mary's Hospital, College of Medicine, The Catholic University of Korea, Seoul

<sup>13</sup>Department of Ophthalmology, Paik Hospital, Ilsan, Inje Medical College, Korea.

<sup>14</sup>Department of Ophthalmology, Seoul National University Bundang Hospital, Seoul National University College of Medicine, Seongnam, Republic of Korea

†These authors contributed equally to this work.

\*Corresponding author:

Joon Young Hyon, MD, PhD

Department of Ophthalmology, Seoul National University Bundang Hospital, Seongnam, Korea

82 Gumi-ro 173beon-gil, Bundang-gu, Seongnam-si, Gyeonggi-do, Korea

TEL: +82-31-787-7379

FAX: +82-31-787-4057

E-mail: [jyhyon@gmail.com](mailto:jyhyon@gmail.com)

## SUPPLEMENTARY TABLES

**Supplementary table S1. The number of right eyes included in each group**

|                              | <b>HA 0.15%</b> | <b>CsA 0.05%+CMC 0.5%</b> | <b>HA 0.15%+CsA 0.05%</b> |
|------------------------------|-----------------|---------------------------|---------------------------|
| <b>Right eye, number (%)</b> | 81 (66.39)      | 86 (71.07)                | 75 (61.98)                |

**Supplementary table S2. Baseline severity proportion of OSDI score.** There is no statistical difference between groups ( $p>0.05$ )

|                                    | <b>HA 0.15%</b> | <b>CsA 0.05%+CMC 0.5%</b> | <b>HA 0.15%+CsA 0.05%</b> |
|------------------------------------|-----------------|---------------------------|---------------------------|
| <b>Under 13, number (%)</b>        | 25 (20.49)      | 27 (22.31)                | 26 (22.31)                |
| <b>Mild(13~22), number (%)</b>     | 27 (22.13)      | 24 (19.83)                | 29 (23.77)                |
| <b>Moderate(23~32), number (%)</b> | 26 (21.31)      | 21 (17.35)                | 26 (21.31)                |
| <b>Severe(33~100), number (%)</b>  | 44 (36.06)      | 49 (40.49)                | 41 (33.60)                |

**Supplementary table S3. Baseline severity proportion of eyes with corneal staining.** There is no statistical difference between groups ( $p>0.05$ )

|                            | <b>HA 0.15%</b> | <b>CsA 0.05%+CMC 0.5%</b> | <b>HA 0.15%+CsA 0.05%</b> |
|----------------------------|-----------------|---------------------------|---------------------------|
| <b>Grade 1, number (%)</b> | -               | -                         | -                         |
| <b>Grade 2, number (%)</b> | 97(79.50)       | 102(84.29)                | 101(83.47)                |
| <b>Grade 3, number (%)</b> | 20(16.39)       | 19(15.70)                 | 18(14.75)                 |
| <b>Grade 4, number (%)</b> | 5 (4.09)        | -                         | 3 (2.45)                  |
